# Supplementary material
Source: PubMed Central journal article supplement (PMC3563840)
Supplement: NIHMS430365-supplement-1.pdf [file NIHMS430365-supplement-1.pdf]

**A. Related to Fig. 2. Changes in the expression of selected protein markers in IL-21 stimulated Ly7 cells.** Whole cell lysates were used in Western Blot analysis. *n.s.*, Non-specific band.

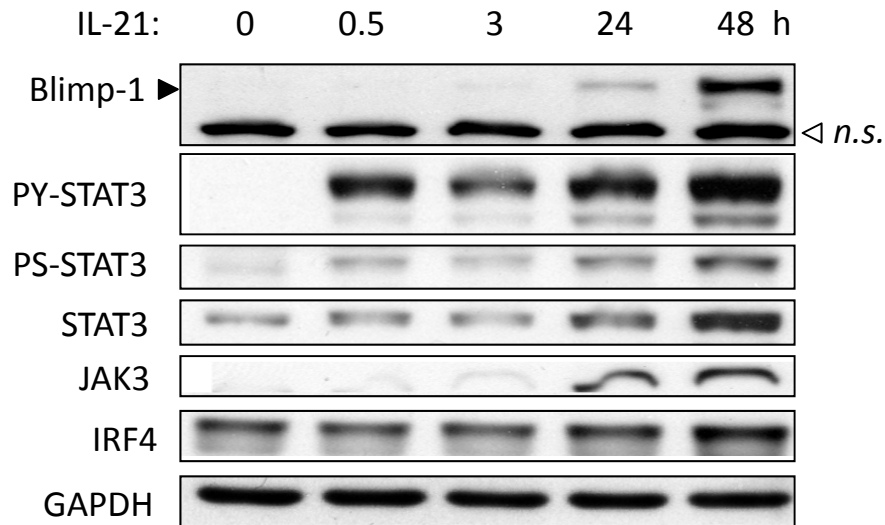

**B. Related to Fig. 3B. IRF4 protein expression changes in the Ly7 differentiation culture.** The histogram function of the Photoshop program was used to quantify the intensity of each band. The numbers for each IRF4/Mum1 band was first normalized to the GAPDH loading control and then to the un-stimulated control sample (ctrl), which was set as 1.0.

(Fig. 3B)

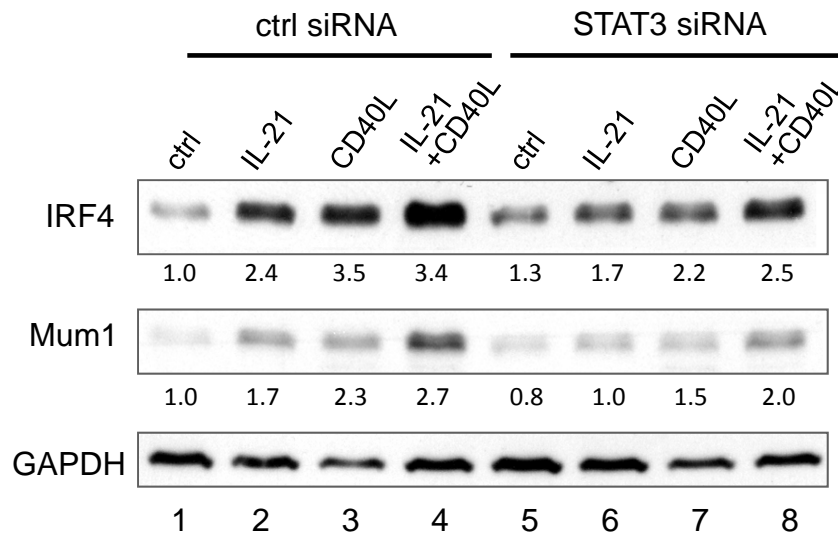

Related to Fig. 3. Changes in the mRNA for IL-21R, Jak3, STAT3, and spliced XBP-1 (XBP-1S) during treatment with either IL-21, CD40L or IL-21+CD40L (double). All values were normalized to that in the untreated cells defined as 1.0.

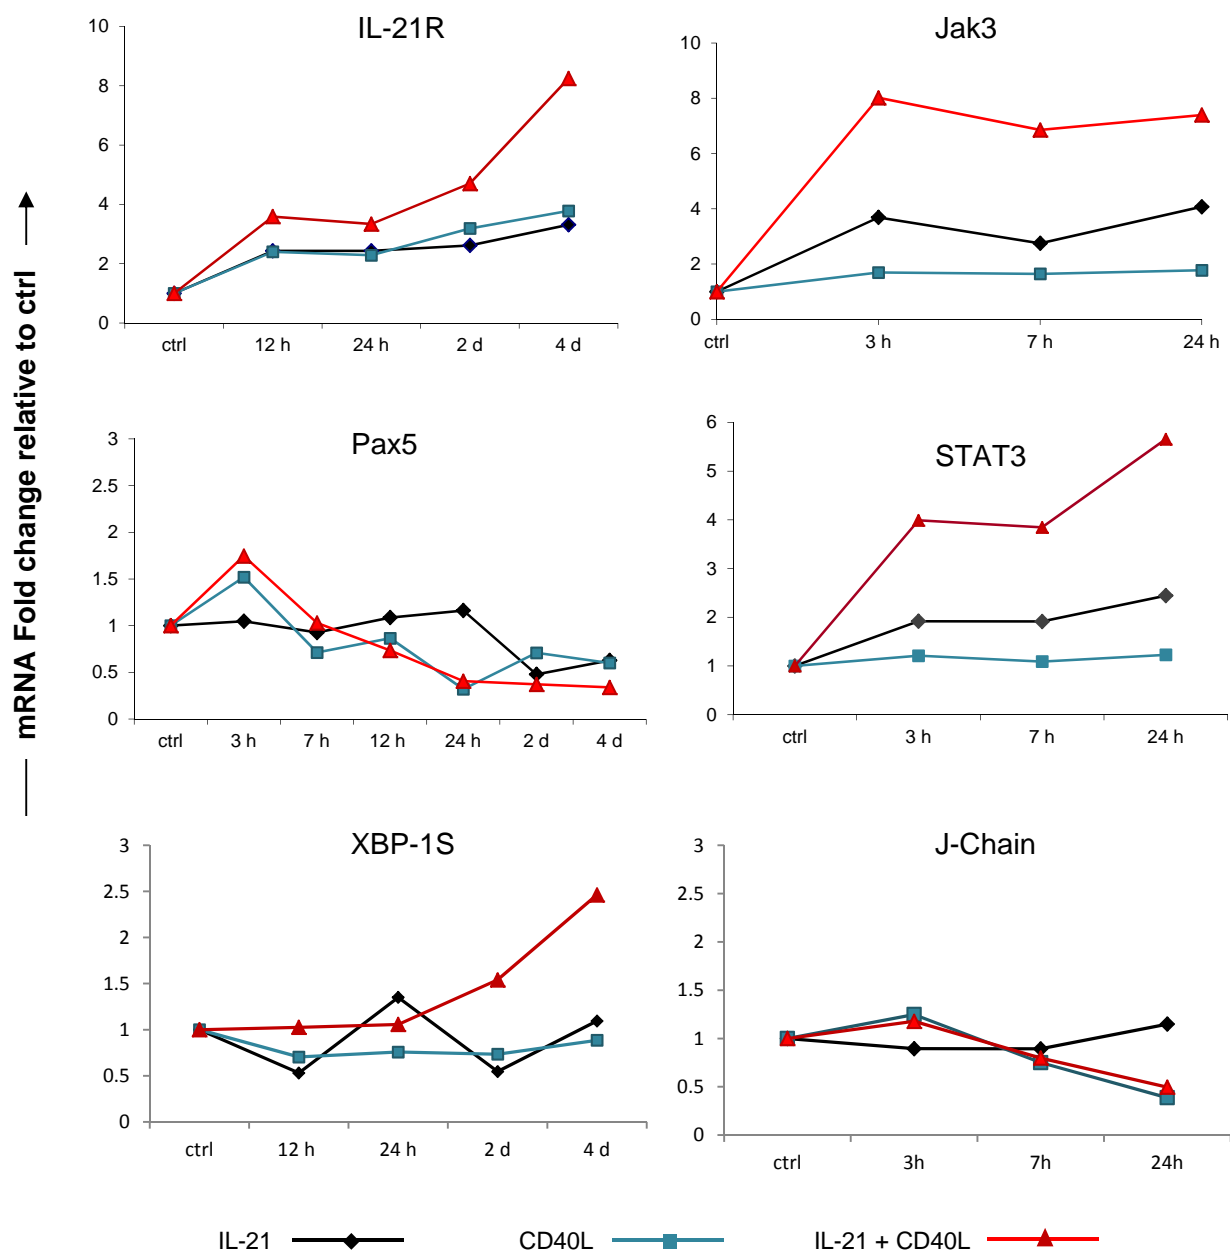

Ding et al, Supplementary Figure S3.

**A. Related to Fig. 5B. Sequences surrounding the shared BCL6/STAT3 site in intron 3 of the human *PRDM1* locus.** This motif corresponds to “site 7” identified by Kwon et al (ref. 23). Mammalian conservation score and alignment with other species are copied from the UCSC Genome Browser (<http://genome.ucsc.edu>; the human genome data is from the Feb. 2009 release).

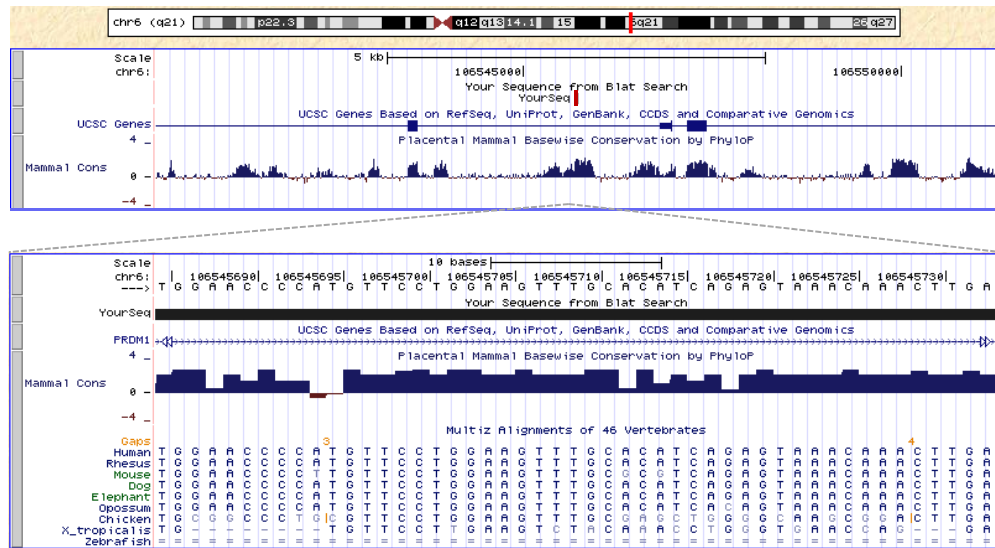

Composite BCL6/STAT3 site : 5' **TTCTGGAA** 3'  
 High affinity BCL6 site : 5' TTCCTaGAA 3'  
 High affinity STAT3 site : 5' TTCNNGAA 3'

**B. Related to Fig. 5C. BCL6 protein changes after IL-21 stimulation with or without CD40L pre-treatment.** Quantification of the BCL6 and GAPDH bands were achieved via the infrared fluorescence- based Odyssey® Imaging System. Normalized BCL6 signals are plotted in the graphs below with the intensity of BCL6 band from untreated sample set as 1.00.

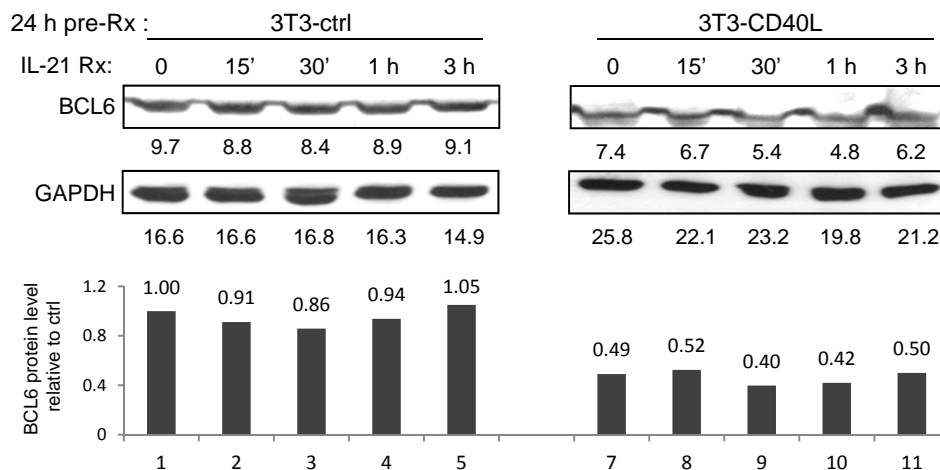

**Supplementary Table S1. Sequences of Primers used in qRT-PCR and qChIP assays.**

| Gene/Motif                                            |           | Sequence                       |
|-------------------------------------------------------|-----------|--------------------------------|
| <b>qRT-PCR primers for the following human genes</b>  |           |                                |
| TBP (TATA box binding protein)                        | sense     | 5' GCACAGGAGCCAAGAGTGAA 3'     |
|                                                       | antisense | 5' TCACAGCTCCCCACCATATT 3'     |
| PRDM1                                                 | sense     | 5' ATGCGGATATGACTCTGTGGA 3'    |
|                                                       | antisense | 5' CTGAACCGAAGTACCGCCATC 3'    |
| IL-21R                                                | sense     | 5' CCCGACCTCGTCTGCTACA 3'      |
|                                                       | antisense | 5' TGGTCTTGCCAGGTAAGGGT 3'     |
| IRF4                                                  | sense     | 5' GCCAAGATTCCAGGTGACTC 3'     |
|                                                       | antisense | 5' ATCGTAGCCCCTCAGGAAAT 3'     |
| J-chain                                               | sense     | 5' TGGGATTACAGCCCAAGAAG 3'     |
|                                                       | antisense | 5' CCGGGCCGAAGAGATTTCTG 3'     |
| Jak3                                                  | sense     | 5' CCCAGCGCCTATCTTTCTC 3'      |
|                                                       | antisense | 5' GGGAAAGTAAAAGCGAATCCTGTA 3' |
| Pax5                                                  | sense     | 5' CAGCAGGACAGGACATGGAG 3'     |
|                                                       | antisense | 5' CCTTGATGAGCAAGTTCCACT 3'    |
| STAT3                                                 | sense     | 5' ACCTGCAGCAATACCATTGAC 3'    |
|                                                       | antisense | 5' AAGGTGAGGGACTCAAAGTGC 3'    |
| XBP-1s (spliced XBP-1)                                | Sense     | 5' AGTCCGCAGCAGGTGCAGGCCCA 3'  |
|                                                       | antisense | 3' ACTGGGTCCAAGTTGTCCAG 3'     |
| <b>qChIP primers for the human <i>PRDM1</i> locus</b> |           |                                |
| 5' site B/C                                           | sense     | 5' AAGCAGCGAGTGTGTGCTAA 3'     |
|                                                       | antisense | 5' AAGCAAACAAAAGCCCAAC 3'      |
| Intron 3 BCL6/STAT3 site                              | Sense     | 5' GCACCGACATTGCTGTTTTT 3'     |
|                                                       | antisense | 3' AGAGCTTTTGCGGTGTGTTT 3'     |
